# Supplementary material for: Holocene Sea Level Recorded by Beach Rocks at Ionian Coasts of Apulia (Italy)
Source: MDPI journal article supplement (doi:10.3390/geosciences13070194), 2023-06-27
Supplement: s1 [file s1]

*Bibliographic references on the beach rock along the Mediterranean coasts.*

1. Aloisi, J.C.; Monaco, A.; Planchais, N.; Thommeret, J.; Thommeret, Y. The Holocene Transgression in the Golfe Du Lion, Southwestern France: Paleogeographic and Paleobotanical Evolution. *Géographie physique et Quaternaire* **1978**, *32*, 145, doi:10.7202/1000346ar.
2. Fierro, G.; Piacentino, G.B.; Tucci, S. Caratteri Morfologici e Litogenetici Di Una “Beachrock” Della Liguria Occidentale. *Atti Società Toscana di Scienze Naturali Pisa*, **1974**, *A 81*, 89–102.
3. Gewalt, M.; Fierro, G. Le beach-rock de Capo Noli (Finale Ligure, Italie): datation 14C et variations diurnes du pH dans des cuvettes. *MOM Éditions* **1984**, *8*, 55–66.
4. Vacchi, M.; Rovere, A.; Zouros, N.; Firpo, M. Assessing Enigmatic Boulder Deposits in NE Aegean Sea: Importance of Historical Sources as Tool to Support Hydrodynamic Equations. *Natural Hazards and Earth System Sciences* **2012**, *12*, 1109–1118, doi:https://doi.org/10.5194/nhess-12-1109-2012.
- 5-6. De Muro, S. Aspetti Geomorfologica e Cronologici Di Paleolinee Di Riva Sommerse Oloceniche Nella Piattaforma Prossimale Tra Capo Ferro e Capo Monti Russu (Sardegna Nord-Orientale). *Memorie Descrittive della Carta Geologica d'Italia* **1994**, *LII*, 309–322.
7. Vacchi, M.; Ghilardi, M.; Melis, R.T.; Spada, G.; Giaime, M.; Marriner, N.; Lorscheid, T.; Morhange, C.; Burjachs, F.; Rovere, A. New Relative Sea-Level Insights into the Isostatic History of the Western Mediterranean. *Quaternary Science Reviews* **2018**, *201*, 396–408, doi:10.1016/j.quascirev.2018.10.025.
8. De Muro, S.; Orrù, P. *Il contributo delle beach-rock nello studio della risalita del mare olocenico: le beach-rock post-glaciali della Sardegna nord-orientale. Il Quaternario, Italian Journal of Quaternary Sciences*, **1998**, *11*(1), 19-39
9. Ulzega, A.; Leone, F.; Orru, P. Geomorphology of Submerged Late Quaternary Shorelines on the South Sardinian Continental Shelf. *Journal of Coastal Research* **1986**, 73–82.
10. Orrù, P.E.; Mastronuzzi, G.; Deiana, G.; Pignatelli, C.; Piscitelli, A.; Solinas, E.; Spanu, P.G.; Zucca, R. Sea Level Changes and Geoarchaeology between the Bay of Capo Malfatano and Piscinnì Bay (SW Sardinia) in the Last 4 Kys. *Quaternary International* **2014**, *336*, 180–189, doi:10.1016/j.quaint.2014.03.054.
11. Deiana, G.; Lecca, L.; Melis, R.; Soldati, M.; Demurtas, V.; Orrù, P.E.; Submarine Geomorphology of the Southwestern Sardinian Continental Shelf (Mediterranean Sea): Insights into the Last Glacial Maximum Sea-Level Changes and Related Environments. *Water* **2021**, *13*, 155, doi:10.3390/w13020155.
12. Deiana, G.; Meleddu, A.; Paliaga, E.M.; Todde, S.; Orrù, P.E. Continental Slope Geomorphology: Landslides and Pockforms of Southern Sardinian Margin (Italy). *Geografia Fisica e Dinamica Quaternaria* **2016**, *39*, 129–136, doi:10.4461/GFDQ2016.39.12.
13. Orrù, P.E.; Mastronuzzi, G.; Deiana, G.; Pignatelli, C.; Piscitelli, A.; Solinas, E.; Spanu, P.G.; Zucca, R. Sea Level Changes and Geoarchaeology between the Bay of Capo Malfatano and Piscinnì Bay (SW Sardinia) in the Last 4 Kys. *Quaternary International* **2014**, *336*, 180–189, doi:10.1016/j.quaint.2014.03.054.
14. Putignano, M.L.; Orrù, P.E.; Schiattarella, M. Holocene Coastline Evolution of Procida Island, Bay of Naples, Italy. *Quaternary International* **2014**, *332*, 115–125, doi:10.1016/j.quaint.2014.03.003.
15. Pirazzoli, P.A. La relativité des niveaux de la mer. *Mappemonde* **1998**, *52*, 7–10.
16. Pirazzoli, P.A.; Mastronuzzi, G.; Saliège, J.F.; Sansò, P. Late Holocene Emergence in Calabria, Italy. *Marine Geology* **1997**, *141*, 61–70, doi:10.1016/S0025-3227(97)00057-1.
17. Pirazzoli, P.A. *Sea-Level Changes: The Last 20 000 Years*; Sea-level changes: the last 20 000 years; 1996; ISBN 978-0-471-96913-6.
18. Stanley, J.-D. Kaulonia, Southern Italy: Calabrian Arc Tectonics Inducing Holocene Coastline Shifts. *Méditerranée. Revue géographique des pays méditerranéens / Journal of Mediterranean geography* **2007**, 7–15, doi:10.4000/mediterranee.152.
19. Pirazzoli, P. Sea state and sea level. *Bulletin d'Association de Geographes Français* **1996**, *73*, x2-290.
20. Spampinato, C.R.; Scicchitano, G.; Ferranti, L.; Monaco, C.; Raised Holocene paleo-shorelines along the Capo Schisò coast, Taormina: new evidence of recent co-seismic deformation in Northeastern Sicily (Italy). *Journal of Geodynamics* **2012**, *55*, 18–31, doi:10.1016/j.jog.2011.11.007.
21. Vött, A.; Bareth, G.; Brückner, H.; Curdt, C.; Fountoulis, I.; Grapmayer, R.; Hadler, H.; Hoffmeister, D.; Klasen, N.; Lang, F.; et al. Beachrock-Type Calcarenitic Tsunamites along the Shores of the Eastern

Ionian Sea (Western Greece) Case Studies from Akarnania, the Ionian Islands and the Western Peloponnese. *Zeitschrift für Geomorphologie, Supplementary Issues* **2010**, 1–50, doi:10.1127/0372-8854/2010/0054S3-0018.

22. Fouache, E.; Dalongeville, R. De la nécessaire prise en compte des sédiments dans la connaissance des variations récentes de la ligne de rivage. Exemples d'Aghios Andreas (Grèce) et de Guverdjine Kaya (Syrie)/Taking into account sediments in the assessment of recent variations in the coastline :the examples of Aghios Andreas (Greece) and Guverdjine Kaya (Syria). *Géomorphologie : relief, processus, environnement* **1998**, 4, 131–140, doi:10.3406/morfo.1998.950.
23. Stefanon, A. Submerged Beachrock in the Gulf of Venice (Italy): Key to the Knowledge of the Local Coastline Evolution in the Last Few Thousand Years. *Quaternaria* **1971**, 14, 191–193.
24. Strasser, A.; Davaud, E.; Jedoui, Y. Carbonate Cements in Holocene Beachrock: Example from Bahiret et Biban, Southeastern Tunisia. *Sedimentary Geology* **1989**, 62, 89–100, doi:10.1016/0037-0738(89)90103-6.
25. Desruelles, S.; Fouache, É.; Ciner, A.; Dalongeville, R.; Pavlopoulos, K.; Kosun, E.; Coquinot, Y.; Potdevin, J.-L. Beachrocks and Sea Level Changes since Middle Holocene: Comparison between the Insular Group of Mykonos–Delos–Rhenia (Cyclades, Greece) and the Southern Coast of Turkey. *Global and Planetary Change* **2009**, 66, 19–33, doi:10.1016/j.gloplacha.2008.07.009.
- 26-27. Karkani, A.; Evelpidou, N.; Vacchi, M.; Morhange, C.; Tsukamoto, S.; Frechen, M.; Maroukian, H. Tracking Shoreline Evolution in Central Cyclades (Greece) Using Beachrocks. *Marine Geology* **2017**, 388, 25–37, doi:10.1016/j.margeo.2017.04.009.
28. Vousdoukas, M.I.; Velegrakis, A.F.; Karambas, T.V. Morphology and Sedimentology of a Microtidal Beach with Beachrocks: Vatera, Lesbos, NE Mediterranean. *Continental Shelf Research* **2009**, 29, 1937–1947.
29. Avcıoğlu, M.; Yigitbas, E.; Erginal, A. Beachrock Formation on the Coast of Gökçeada Island and Its Relation to the Active Tectonics of the Region, Northern Aegean Sea, Turkey. *Quaternary International* **2016**, 401, doi:10.1016/j.quaint.2015.10.108.
30. Erginal, A.E. Beachrock as Evidence of Sea-Level Lowstand during the Classical Period, Parion Antique City, Marmara Sea, Turkey. *Geodinamica Acta* **2012**, 25, 96–103, doi:10.1080/09853111.2013.842740.
31. Erginal, A.; Kiyak, N.; Ozturk, M.Z.; Avcıoğlu, M.; Bozcu, M.; Yigitbas, E. Cementation Characteristics and Age of Beachrocks in a Fresh-Water Environment, Lake İznik, NW Turkey. *Sedimentary Geology* **2012**, 243–244, doi:10.1016/j.sedgeo.2011.10.012.
32. Fouache, É.; Sibella, P.; Dalongeville, R. Harbours and Holocene Variations of the Shoreline between Andriake and Alanya (Turkey). *Méditerranée. Revue géographique des pays méditerranéens / Journal of Mediterranean geography* **2005**, 87–94, doi:10.4000/mediterranee.2322.
33. Desruelles, S.; Fouache, É.; Ciner, A.; Dalongeville, R.; Pavlopoulos, K.; Kosun, E.; Coquinot, Y.; Potdevin, J.-L. Beachrocks and Sea Level Changes since Middle Holocene: Comparison between the Insular Group of Mykonos–Delos–Rhenia (Cyclades, Greece) and the Southern Coast of Turkey. *Global and Planetary Change* **2021**, 66, 19–33.
34. Ertek, T.; Kılıç, E.; Erginal, A.; Ekinici, Y.L.; Demirci, A. Preliminary Assessment of Submerged Beachrock and Tsunamigenic Deposit, Hasır Island, Marmara Archipelago, Turkey. *Journal of Coastal Research* **2014**, 300, doi:10.2112/JCOASTRES-D-12-00177.1.
35. El-Sayed, M.Kh. Beachrock Cementation in Alexandria, Egypt. *Marine Geology* **1988**, 80, 29–35, doi:10.1016/0025-3227(88)90070-9.
36. Rovere, A.; Furlani, S.; Benjamin, J.; Fontana, A.; Antonioli, F. MEDFLOOD Project: MEDiterranean Sea-Level Change and Projection for Future FLOODing. *Alpine and Mediterranean Quaternary* **2012**, 25 (2), 3–5.
